# Supplementary material for: Chronic Voluntary Alcohol Consumption Alters Promoter Methylation and Expression of Fgf-2 and Fgfr1
Source: Int J Mol Sci. 2023 Feb 7;24(4):3336. doi: 10.3390/ijms24043336 (PMC9963845; doi:10.3390/ijms24043336)
Supplement: Supplementary file 1 [file ijms-24-03336-s001.zip › Revision_Herburg et al., 2023_Supplementary files.pdf]

### Supplementary Materials:

**Supplemental Table S1.** Analyzed C57BL/6J animals for this study. Body weights were determined at the beginning of the experiments.

| Animal number | Start body weight (g) | Group   |
|---------------|-----------------------|---------|
| 421           | 24.98                 | Alcohol |
| 422           | 26.6                  | Alcohol |
| 423           | 24.14                 | Alcohol |
| 442           | 28.67                 | Control |
| 443           | 28.93                 | Control |
| 444           | 28.29                 | Alcohol |
| 445           | 28.96                 | Alcohol |
| 477           | 27.75                 | Control |
| 478           | 26.91                 | Control |
| 479           | 25.48                 | Control |
| 480           | 27.89                 | Alcohol |
| 481           | 28.81                 | Alcohol |
| 482           | 26.54                 | Control |
| 483           | 29.53                 | Control |
| 484           | 26.13                 | Control |
| 485           | 26.53                 | Alcohol |
| 486           | 25.31                 | Alcohol |
| 487           | 28.37                 | Alcohol |

**Supplemental Table S2.** *Fgf-2* and *Fgfr1* primer sequences for methylation analysis. *Fgf-2* (fibroblast growth factor 2), *Fgfr1* (fibroblast growth factor receptor 1), TSS (transcription start site, first base of exon 1), T<sub>m</sub> (melting temperature).

| Primer name | Primer sequence (5' to 3') | Position counting from TSS (bp) | T <sub>m</sub> |
|-------------|----------------------------|---------------------------------|----------------|
| Fgf-2 F3    | TAAGAAATATTTAATAATTGAGG    | -121                            | 50.7 °C        |
| Fgf-2 R2    | TAACAACTCTTAAACTCCC        | +475                            |                |
| Fgf-2 F4    | GTTGTATTGGGTTGGGAGTT       | +360                            | 58 °C          |
| Fgf-2 R4    | TCTTAATATCCCAAATCCCC       | +757                            |                |
| Fgfr1 F1    | GAAAAGAATTATTGGAGTTAGGTGT  | -629                            | 58 °C          |
| Fgfr1 R1    | CTAATTTTCCACCTCCCTTC       | +28                             |                |

**Supplemental Table S3.** Sequences of primers used for qRT-PCR (quantitative reverse transcription polymerase chain reaction).

| Gene         | Primer sequence                                          | Product size | Melting point |
|--------------|----------------------------------------------------------|--------------|---------------|
| <i>Fgf-2</i> | 5'-GAGAAGAGCGACCCACACG-3'<br>5'-GGCACACACTCCCTTGATAGA-3' | 78 bp        | 77 °C         |
| <i>Fgfr1</i> | 5'-CTTGCCGTATGTCCAGATCC-3'<br>5'-TCCGTAGATGAAGCACCTCC-3' | 77 bp        | 76 °C         |
| <i>Gapdh</i> | 5'-GAACATCATCCCTGCATCCA-3'<br>5'-GAACATCATCCCTGCATCCA-3' | 78 bp        | 81.1 °C       |

**Supplemental Table S1.** Statistics of significant CpG positions of the *Fgf-2* gene. Two-tailed *t*-tests were performed with Prism 8.0; *t* (test statistic), *df* (degrees of freedom); PFC (prefrontal cortex), NAc (nucleus accumbens), DLS (dorsolateral striatum), DMS (dorsomedial striatum), VTA (ventral tegmental area).

|        |              | <i>t</i> -Test for Equality of Means |           |                 |
|--------|--------------|--------------------------------------|-----------|-----------------|
| Tissue | CpG position | <i>t</i>                             | <i>df</i> | <i>p</i> -value |
| Blood  | +174         | -2.397                               | 11        | 0.03            |
| PFC    | +555         | 2.114                                | 18        | 0.05            |
|        | +660         | 2.447                                | 18        | 0.02            |
|        | +700         | 2.463                                | 13.2      | 0.03            |
| NAc    | +342         | -2.237                               | 16        | 0.04            |
|        | +381         | -2.097                               | 18        | 0.05            |
|        | +552         | 2.438                                | 18        | 0.03            |
| DLS    | +268         | -2.450                               | 17        | 0.03            |
|        | +552         | -2.910                               | 18        | 0.01            |
|        | +702         | 2.347                                | 18        | 0.03            |
| DMS    | +278         | -2.590                               | 16        | 0.02            |
|        | +307         | -2.213                               | 15        | 0.04            |
| VTA    | +558         | 2.681                                | 18        | 0.02            |
|        | +609         | 2.913                                | 18        | 0.01            |
|        | +636         | 2.305                                | 18        | 0.03            |
|        | +639         | 2.965                                | 18        | 0.01            |
|        | +643         | 2.333                                | 18        | 0.03            |
|        | +669         | 2.435                                | 18        | 0.03            |

**Supplemental Table S2.** Fixed effects of factors and covariates of the MLM model with *Fgf-2* methylation as dependent variable. Df (degrees of freedom), ddCT (delta-delta Ct).

| Source                   | Numerator df | Denominator df | F-statistics | Significance          |
|--------------------------|--------------|----------------|--------------|-----------------------|
| Intercept                | 1            | 6064           | 2591.09      | 0.00                  |
| CpG position             | 65           | 6064           | 67.69        | 0.00                  |
| Tissue                   | 5            | 6064           | 56.89        | 5.2x10 <sup>-58</sup> |
| Group                    | 1            | 6064           | 76.36        | 3x10 <sup>-18</sup>   |
| FGF2_ddCT                | 1            | 6064           | 9.84         | 0.002                 |
| Tissue * Group           | 5            | 6064           | 25.11        | 3.9x10 <sup>-25</sup> |
| Tissue*Group * FGF2_ddCT | 11           | 6064           | 22.56        | 6.8x10 <sup>-46</sup> |

**Supplemental Table S6.** Statistics of significant CpG positions of the *Fgfr1* gene. Two-tailed *t*-tests were performed with Prism 8.0; *t* (test statistic), *df* (degrees of freedom); PFC (prefrontal cortex), DLS (dorsolateral striatum).

|        |          | <i>t</i> -Test for Equality of Means |           |                 |
|--------|----------|--------------------------------------|-----------|-----------------|
| Tissue | Position | <i>t</i>                             | <i>df</i> | <i>p</i> -value |
| PFC    | -270     | 3.740                                | 18        | 0.002           |
| DLS    | -361     | 2.210                                | 17        | 0.04            |

**Supplemental Table S7.** Prediction of transcription factor binding sites within the *Fgfr1* promoter; PFC prefrontal cortex), DLS (dorsolateral striatum). Factorbook was used for binding site prediction ([www.factorbook.org](http://www.factorbook.org)).

| Transcription factor                 | Brain region (CpG position) | Consensus sequence |
|--------------------------------------|-----------------------------|--------------------|
| Nuclear Factor Erythroid 2<br>(NFE2) | PFC (-270 bp)               | 5'-ATGA[C/G]TCA-3  |
| Specificity Protein 1 (SP1)          | DLS (-361 bp)               | 5'-CCCCGCCCCC-3'   |
| Zinc Finger Protein 460<br>(ZNF460)  | DLS (-361 bp)               | 5'-GCCTCCCG-3      |

**Supplemental Table S8.** Fixed effects of factors and covariates of the MLM model with *Fgfr1* methylation as dependent variable. Df (degrees of freedom), ddCT (delta-delta Ct).

| Source                      | Numerator df | Denominator df | F-statistics | Significance       |
|-----------------------------|--------------|----------------|--------------|--------------------|
| Intercept                   | 1            | 687            | 52830.23     | 0.00               |
| CpG position                | 6            | 687            | 827.03       | 0.00               |
| Tissue                      | 5            | 687            | 9.43         | 1x10 <sup>-8</sup> |
| Group                       | 1            | 687            | 0.21         | 0.646              |
| FGFR1_ddCT                  | 1            | 687            | 0.76         | 0.384              |
| Tissue * Group              | 5            | 687            | 1.57         | 0.166              |
| Tissue * Group * FGFR1_ddCT | 11           | 687            | 1.28         | 0.229              |

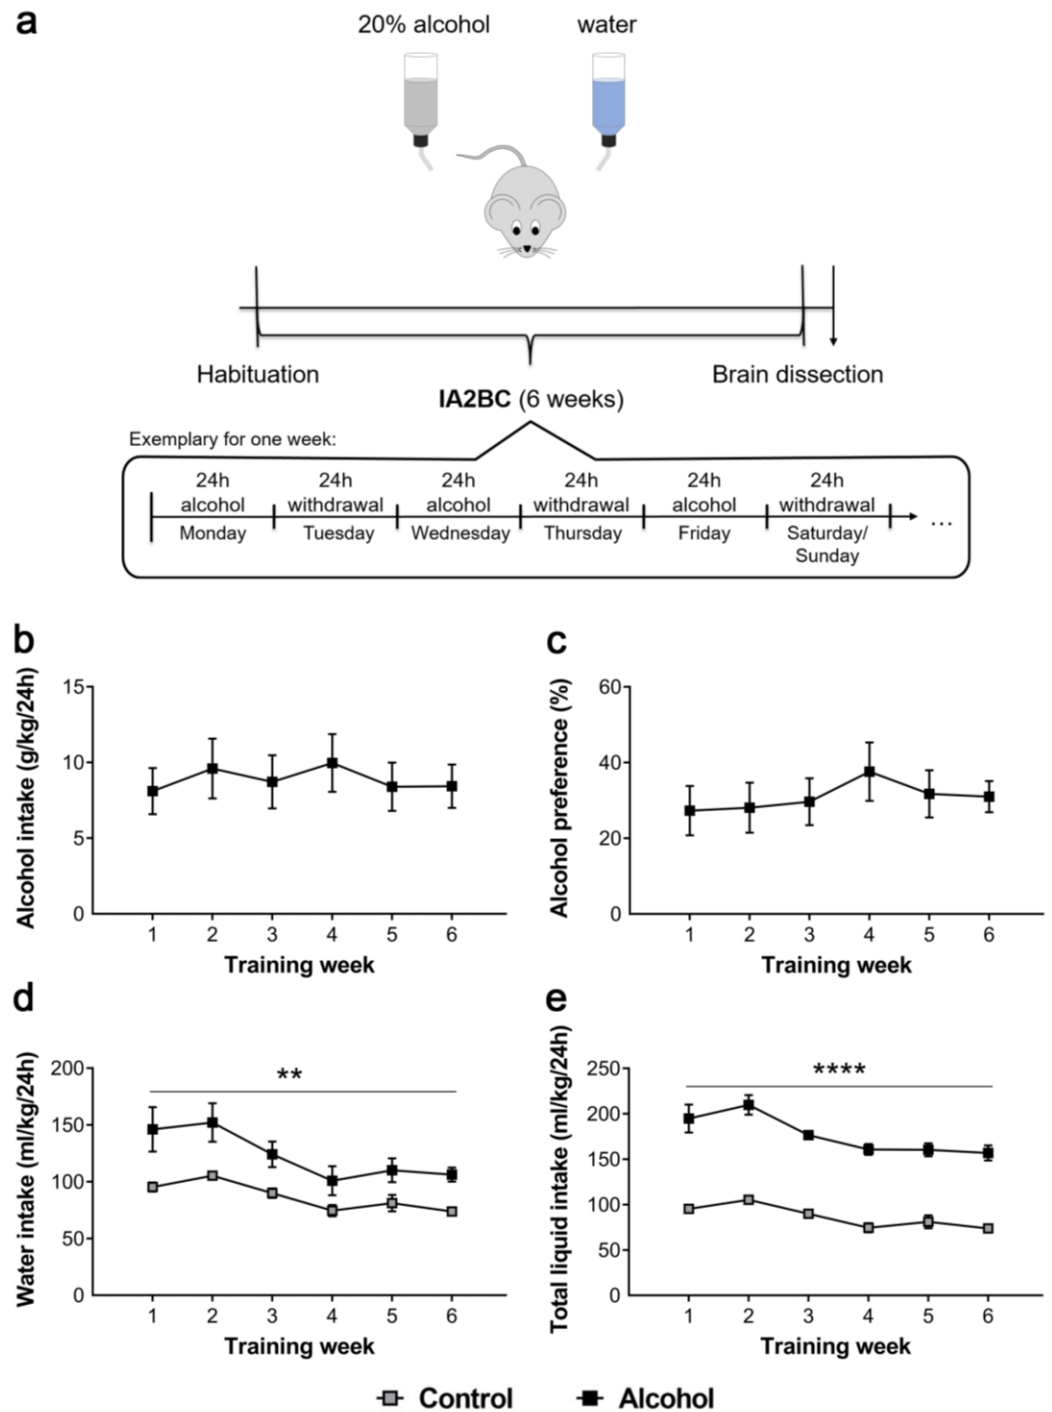

**Supplemental Figure S1.** Experimental timeline scheme of the IA2BC (intermittent access to 20 % alcohol in a two-bottle choice) procedure. Mice were trained to consume alcohol in the IA2BC procedure during a six-week period (a). Alcohol consumption (g/kg/24h; b) and preference (c), water intake (ml/kg/24h; d), and total liquid intake (ml/kg/24h; e) were measured. Data are presented as mean  $\pm$  SEM (standard error of the mean), two-way mixed-model ANOVA;  $n=10$  \*\* $p \leq 0.01$ ; \*\*\*\* $p \leq 0.0001$  compared to control group.

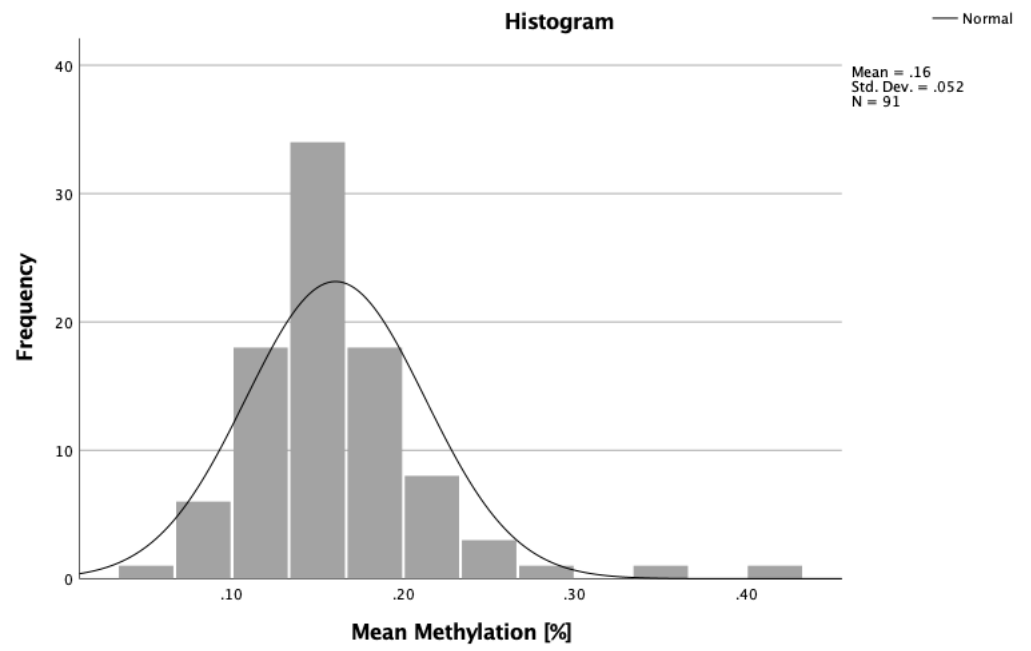

**Supplemental Figure S2.** Distribution of methylation measurements for normality assessment.

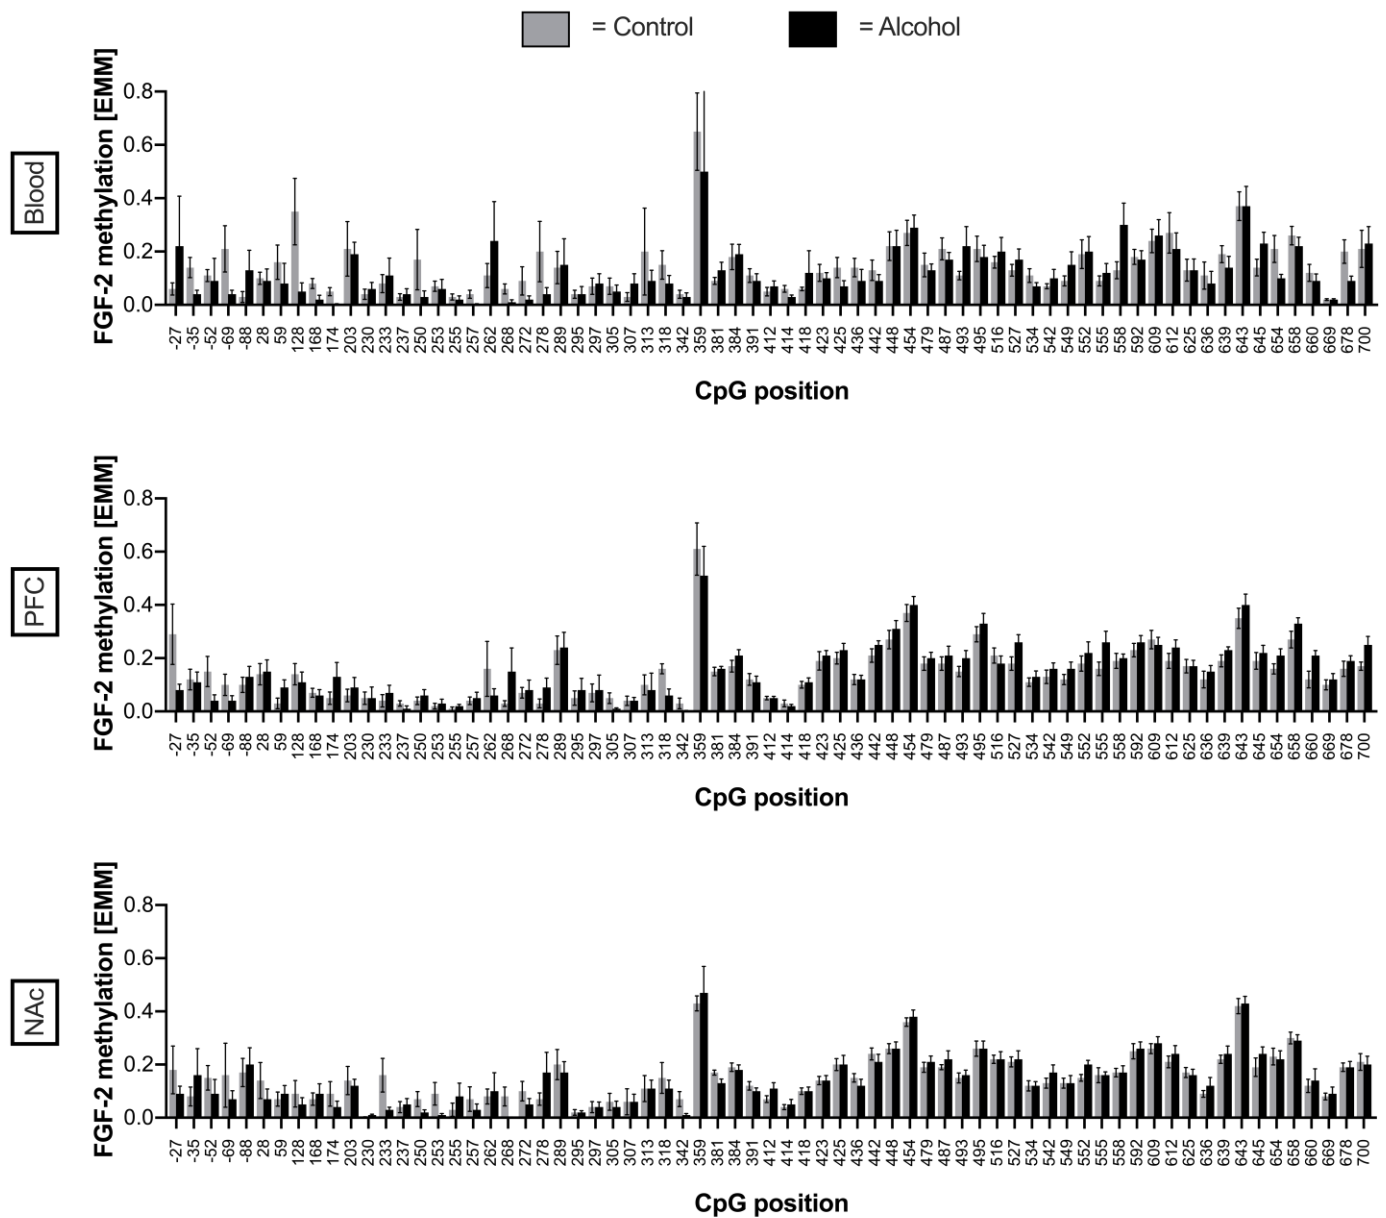

**Supplemental Figure S3.** Alterations in the methylation of *Fgf-2* after alcohol consumption in the blood, PFC (prefrontal cortex), and NAc (Nucleus accumbens). Estimated marginal means of the methylation rate of all 70 examined CpG-sites of the *Fgf-2* promoter in tissue samples after chronic alcohol exposure. Data are represented as mean  $\pm$  SEM (standard error of the mean) (n=10 biological replicates).

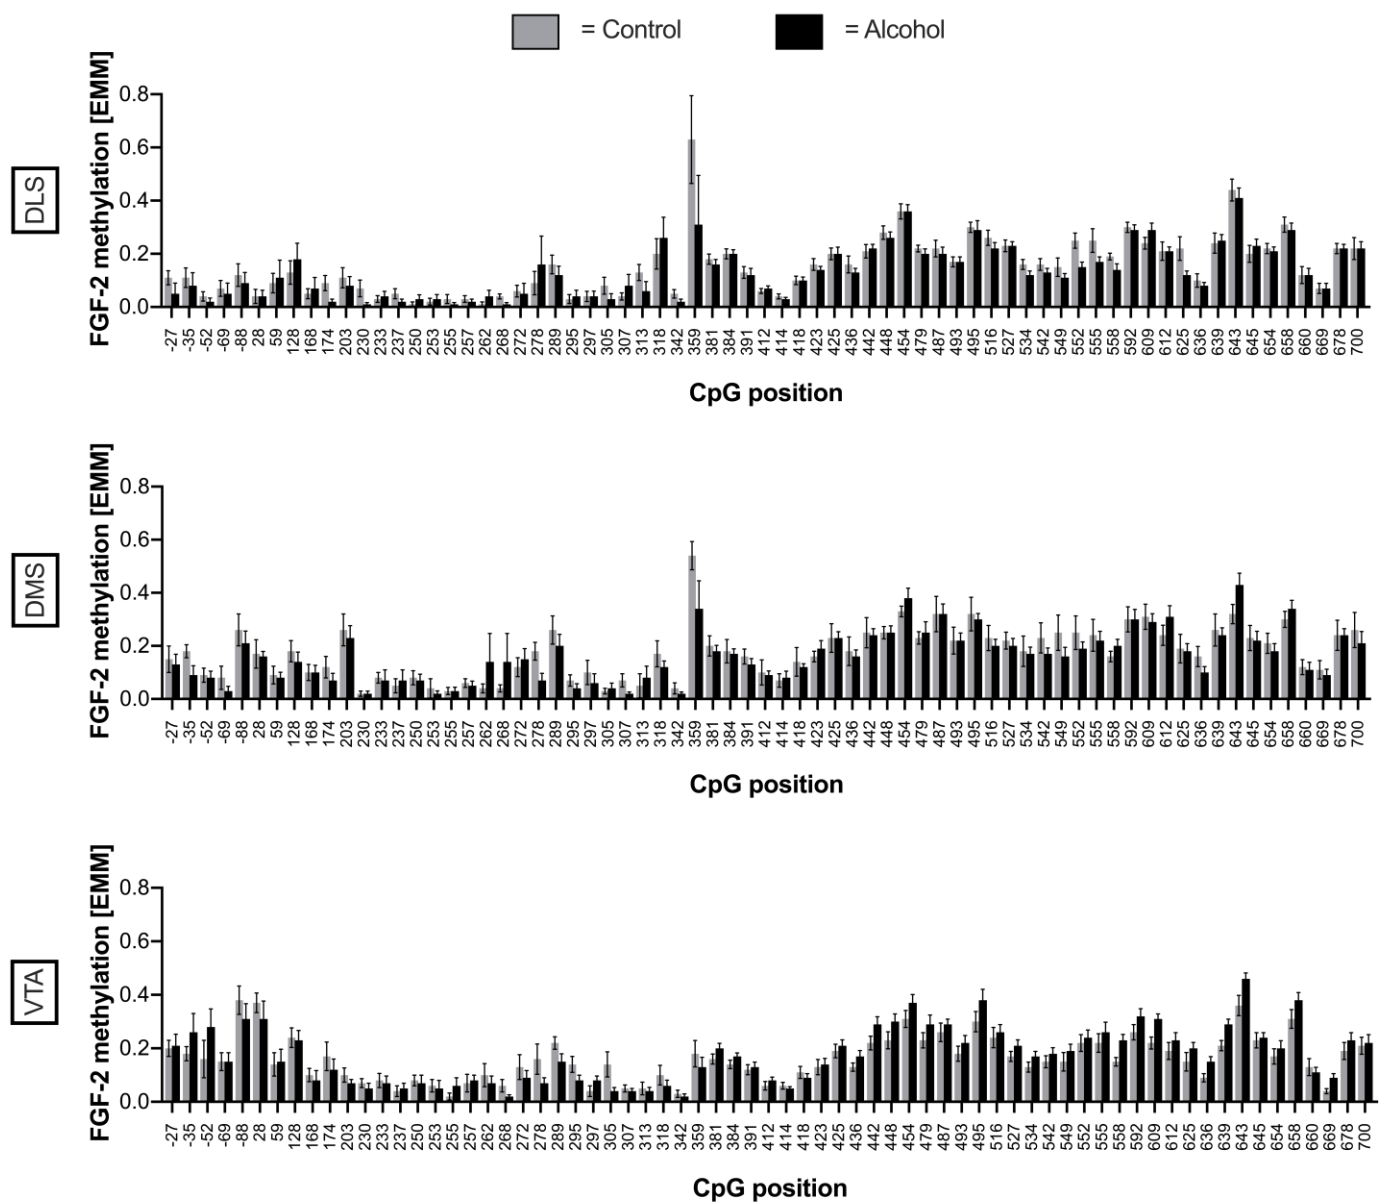

**Supplemental Figure S4.** Alterations in the methylation of *Fgf-2* after alcohol consumption in DLS (dorsolateral striatum), DMS (dorsomedial striatum), and VTA (ventral tegmental area). Estimated marginal means of the methylation rate of all 70 examined CpG-sites of the *Fgf-2* promoter in tissue samples after chronic alcohol exposure. Data are represented as mean  $\pm$  SEM (n=10 biological replicates).

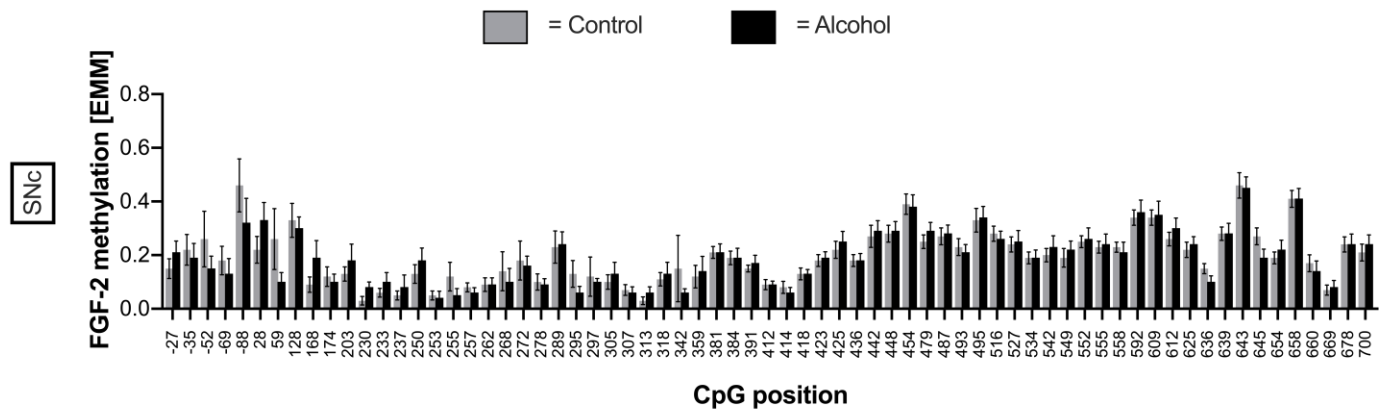

**Supplemental Figure S5.** Alterations in the methylation of *Fgf-2* after alcohol consumption in the SNc (substantia nigra). Estimated marginal means of the methylation rate of all 70 examined CpG-sites of the *Fgf-2* promoter in tissue samples after chronic alcohol exposure. Data are represented as mean  $\pm$  SEM (n=10 biological replicates).

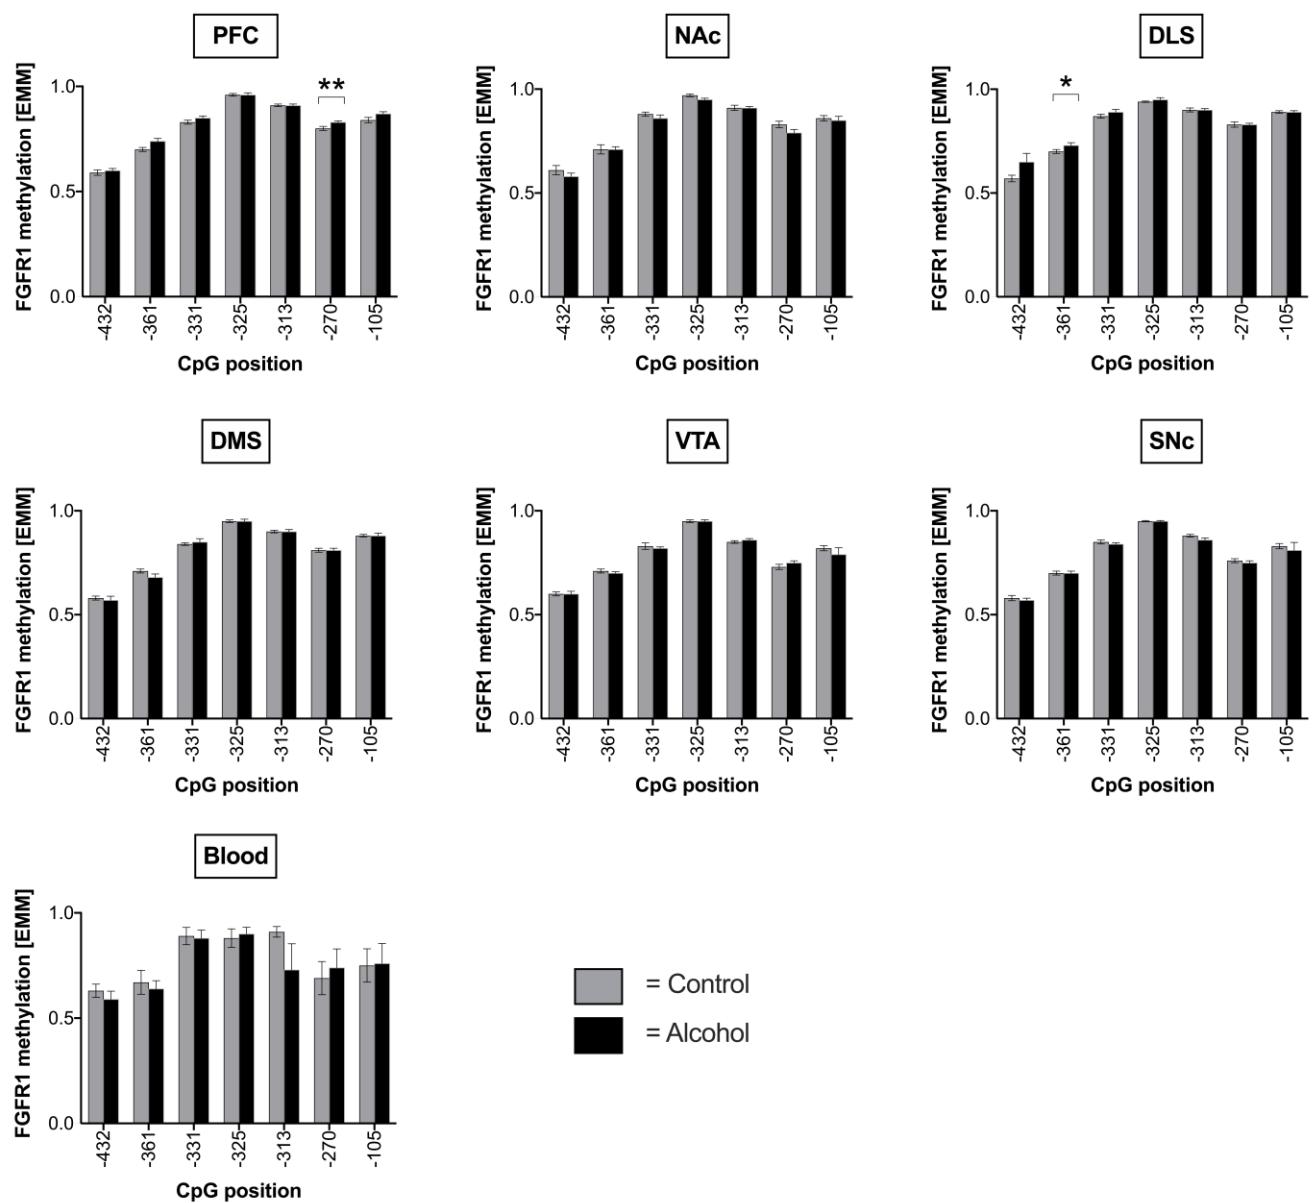

**Supplemental Figure S6.** Alterations in the methylation of *Fgfr1* after alcohol consumption. Estimated marginal means of the methylation rate of all seven examined CpG-sites of the *Fgfr1* promoter in the PFC, NAc, DLS, DMS, VTA, SNc, and blood tissue samples after alcohol (20 % alcohol during a six-week period) exposure. Data are represented as mean  $\pm$  SEM (n=10 biological replicates) with a two-tailed Student's t-test, \* $p \leq 0.05$ ; \*\* $p \leq 0.01$  compared to control group.
