# Supplementary material for: Chronic Voluntary Alcohol Consumption Alters Promoter Methylation and Expression of Fgf-2 and Fgfr1
Source: Int J Mol Sci. 2023 Feb 7;24(4):3336. doi: 10.3390/ijms24043336 (PMC9963845; doi:10.3390/ijms24043336)
Supplement: Supplementary file 1 [file ijms-24-03336-s001.zip › Supplemental Excel File S1.pdf]

| Transcription factor                                                                 | Tissue (CpG position)                            | Binding motif                                                                       | Publications (keywords entered in GeneCards)                                                                                                                                                                    |                                                                                                                                                                                                                                                                                                     |                             |                                                                                          |
|--------------------------------------------------------------------------------------|--------------------------------------------------|-------------------------------------------------------------------------------------|-----------------------------------------------------------------------------------------------------------------------------------------------------------------------------------------------------------------|-----------------------------------------------------------------------------------------------------------------------------------------------------------------------------------------------------------------------------------------------------------------------------------------------------|-----------------------------|------------------------------------------------------------------------------------------|
|                                                                                      |                                                  |                                                                                     | FGF2, FGFR1, growth factors                                                                                                                                                                                     | Alcohol, abuse, addiction, drugs                                                                                                                                                                                                                                                                    | Methylation, epigenetic     | PFC, Nac, DLS, DMS, VTA, SNc, striatal, mesolimbic, reward                               |
| <b>Arnt</b><br>Aryl hydrocarbon receptor<br>nuclear translocator                     | DLS (702)                                        | 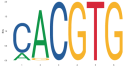   | Mizuta et al., 2008                                                                                                                                                                                             | Attignon et al., 2017<br>Morris et al., 2018                                                                                                                                                                                                                                                        |                             |                                                                                          |
| <b>Arnt2</b><br>Aryl Hydrocarbon Receptor<br>Nuclear Translocator 2                  | DLS (702)                                        | 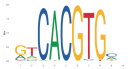   |                                                                                                                                                                                                                 |                                                                                                                                                                                                                                                                                                     | Yin et al., 2017            |                                                                                          |
| <b>ASCL2</b><br>Achaete-Scute Family BHLH<br>Transcription Factor 2                  | VTA (643)                                        | 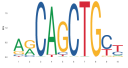   | Hughes et al., 2004                                                                                                                                                                                             |                                                                                                                                                                                                                                                                                                     | Yin et al., 2017            |                                                                                          |
| <b>ATF1</b><br>Activating Transcription Factor 1                                     | VTA (639)                                        | 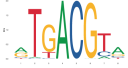   | Tan et al., 1996                                                                                                                                                                                                |                                                                                                                                                                                                                                                                                                     |                             |                                                                                          |
| <b>ATF3</b><br>Activating Transcription Factor 3                                     | DMS (307)<br>VTA (639)                           | 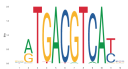   | Tan et al., 1994                                                                                                                                                                                                | Mallory et al., 2005; Julbooru et al., 2009                                                                                                                                                                                                                                                         |                             |                                                                                          |
| <b>CREB1</b><br>CAMP Responsive Element<br>Binding Protein                           | VTA (639)                                        | 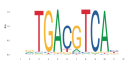   | Tan et al., 1996; Stachowiak et al., 2003                                                                                                                                                                       | Tabakoff et al., 2009;<br>Schumann et al., 2008;<br>Chen et al., 2015;<br>Chanda et al., 2013;<br>Paul et al., 2010;<br>Mahajan et al., 2009; Pandey et al., 2004;<br>Blendy et al., 1998; Wolf et al., 2016; Dinieri et al., 2009; Nestler et al., 2006; Jaworski et al., 2006; Olson et al., 2005 |                             | Dinieri et al., 2009; Nestler et al., 2006;<br>Jaworski et al., 2006; Olson et al., 2005 |
| <b>CREB3L1</b><br>Cyclic AMP-responsive element-<br>binding protein 3-like protein 1 | DLS (307)                                        | 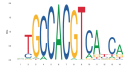   | Zhu et al., 2016                                                                                                                                                                                                |                                                                                                                                                                                                                                                                                                     |                             |                                                                                          |
| <b>CREM</b><br>CAMP Responsive Element<br>Modulator                                  | VTA (639)                                        | 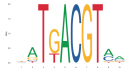 |                                                                                                                                                                                                                 | Miller et al., 2018                                                                                                                                                                                                                                                                                 | Yin et al., 2017            | Miller et al., 2018                                                                      |
| <b>CTCF</b><br>CCCTC-Binding Factor Like                                             | DLS (268-307)<br>VTA (669)                       | 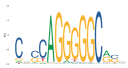 |                                                                                                                                                                                                                 |                                                                                                                                                                                                                                                                                                     |                             |                                                                                          |
| <b>Ddit3</b><br>DNA damage-inducible<br>transcript 3 protein                         | Blood (174bp)                                    | 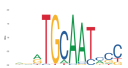 |                                                                                                                                                                                                                 |                                                                                                                                                                                                                                                                                                     |                             |                                                                                          |
| <b>Cebpa</b><br>CCAAT/enhancer-binding<br>protein alpha                              |                                                  |                                                                                     |                                                                                                                                                                                                                 |                                                                                                                                                                                                                                                                                                     |                             |                                                                                          |
| <b>E2F1</b><br>E2F Transcription Factor 1                                            | DLS (268)<br>NAc (342)<br>VTA (636)<br>PFC (700) | 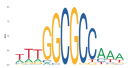 | Zhou et al., 2020; Kanai et al., 2009;<br>Parakati et al., 2005; Stapelberg et al., 2004                                                                                                                        | Major et al., 2017                                                                                                                                                                                                                                                                                  | Yin et al., 2017            |                                                                                          |
| <b>E2F6</b><br>E2F Transcription Factor 6                                            | VTA (636)                                        | 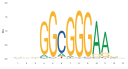 |                                                                                                                                                                                                                 |                                                                                                                                                                                                                                                                                                     |                             |                                                                                          |
| <b>EGR1</b><br>Early Growth Response 1                                               | DLS (268;702)<br>VTA (588)<br>PFC (660, 700)     | 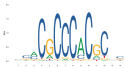 | Kundumani-Sridharan et al., 2010; Fahmy et al., 2003; Shi et al., 2018; Passiatore et al., 2011; Nentwich et al., 2009; Perez-Castro et al., 1997; Bhindl et al., 2005; Midgley et al., 2004; Jin et al., 2000; | Li et al., 2019; Pritchard et al., 2005; Shin et al., 2021; Thomes et al., 2013; Quiñones et al., 2003;                                                                                                                                                                                             | Zandarashvili et al., 2015; |                                                                                          |
| <b>ELF1</b><br>E74 Like ETS Transcription<br>Factor 1                                | PFC (660)                                        | 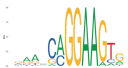 |                                                                                                                                                                                                                 |                                                                                                                                                                                                                                                                                                     | Yin et al., 2017            |                                                                                          |
| <b>ELF2</b><br>E74 Like ETS Transcription<br>Factor 2                                | Nac (342)                                        | 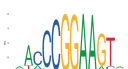 |                                                                                                                                                                                                                 |                                                                                                                                                                                                                                                                                                     | Yin et al., 2017            |                                                                                          |
| <b>ELK4</b><br>ETS Transcription Factor ELK4                                         | NAc (342)                                        | 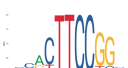 |                                                                                                                                                                                                                 |                                                                                                                                                                                                                                                                                                     | Yin et al., 2017            |                                                                                          |

| Transcription factor                                                    |                                     | Tissue<br>(CpG position)                                                            | Binding motif                                                                                                                                                                                                                                                                 | Publications (keywords entered in GeneCards)                                                                                                                |                                                                                                      |                                                                             |                                                                   |  |
|-------------------------------------------------------------------------|-------------------------------------|-------------------------------------------------------------------------------------|-------------------------------------------------------------------------------------------------------------------------------------------------------------------------------------------------------------------------------------------------------------------------------|-------------------------------------------------------------------------------------------------------------------------------------------------------------|------------------------------------------------------------------------------------------------------|-----------------------------------------------------------------------------|-------------------------------------------------------------------|--|
|                                                                         |                                     |                                                                                     |                                                                                                                                                                                                                                                                               | FGF2, FGFR1, growth factors                                                                                                                                 | Alcohol, abuse, addiction, drugs                                                                     | Methylation, epigenetic                                                     | PFC, Nac, DLS, DMS, VTA, SNc, striatal, mesolimbic, reward        |  |
| <b>FI1</b><br>Friend Leukemia Integration 1<br>Transcription Factor     | NAc (342)                           | 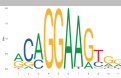   |                                                                                                                                                                                                                                                                               |                                                                                                                                                             |                                                                                                      | Yin et al., 2017                                                            |                                                                   |  |
| <b>FOS</b><br>Fos Proto-Oncogene, AP-1<br>Transcription Factor Subunit  | DLS (268)                           | 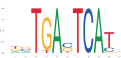   | Kim et al., 2003; Hofer et al., 2005; Weekes et al., 2016; Lee et al., 2013; Rosenthal et al., 2005; Wang et al., 2004; Li et al., 2010; Kang et al., 2005; Taniguchi et al., 2003                                                                                            | Samaha et al., 2004; Tabakoff et al., 2009; Bichenkov et al., 2009; Raatesalmi et al., 2002; Alling et al., 1994; Alling et al., 1993; Valjent et al., 2000 |                                                                                                      |                                                                             | Johnson et al., 2010; Perrotti et al., 2004; Valjent et al., 2000 |  |
| <b>Gfi1b</b><br>Growth Factor Independent 1B<br>Transcription Repressor | Blood (174bp)                       | 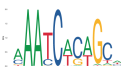   |                                                                                                                                                                                                                                                                               |                                                                                                                                                             |                                                                                                      |                                                                             |                                                                   |  |
| <b>HINFP</b><br>Histone H4 Transcription Factor                         | DMS (307)<br>PFC(660)               | 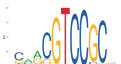   |                                                                                                                                                                                                                                                                               |                                                                                                                                                             |                                                                                                      | Pulukuri et al., 2006                                                       |                                                                   |  |
| <b>KLF1</b><br>Kruppel Like Factor 1                                    | PFC (700)                           | 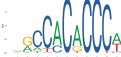   |                                                                                                                                                                                                                                                                               |                                                                                                                                                             |                                                                                                      |                                                                             |                                                                   |  |
| <b>KLF12</b><br>Kruppel Like Factor 12                                  | DMS (278)                           | 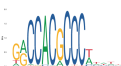   |                                                                                                                                                                                                                                                                               |                                                                                                                                                             |                                                                                                      | Yin et al., 2017                                                            |                                                                   |  |
| <b>KLF15</b><br>Kruppel Like Factor 15                                  | DMS (278)                           | 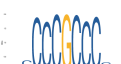   |                                                                                                                                                                                                                                                                               |                                                                                                                                                             |                                                                                                      | Yin et al., 2017                                                            |                                                                   |  |
| <b>MAX</b><br>MYC Associated Factor X                                   | DLS (702)                           | 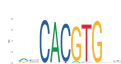  |                                                                                                                                                                                                                                                                               |                                                                                                                                                             |                                                                                                      |                                                                             |                                                                   |  |
| <b>MAZ</b><br>Myc-associated zinc finger<br>protein                     | VTA (558)                           | 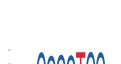 |                                                                                                                                                                                                                                                                               |                                                                                                                                                             |                                                                                                      |                                                                             |                                                                   |  |
| <b>MBD2</b><br>Methyl-CpG Binding Domain<br>Protein 2                   | DMS (278)<br>NAc (381)              |                                                                                     |                                                                                                                                                                                                                                                                               | Bönsch et al., 2006                                                                                                                                         |                                                                                                      | Ghoshal et al., 2004; Jin et al., 2005; Tan et al., 2006; Xing et al., 2008 |                                                                   |  |
| <b>MXI1</b><br>MAX Interactor 1, Dimerization<br>Protein                | DLS (702)                           | 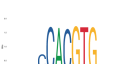 |                                                                                                                                                                                                                                                                               |                                                                                                                                                             |                                                                                                      |                                                                             |                                                                   |  |
| <b>MYC</b><br>MYC Proto-Oncogene, BHLH<br>Transcription Factor          | VTA (643)<br>DLS (702)              | 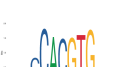 | Park et al., 2020; Ronca et al., 2020; Azamezhad et al., 2018; Liu et al., 2017; Park et al., 2016; Xue et al., 2015; Bhattacharyya et al., 2020;                                                                                                                             | Nakahara et al., 2003; Sauders et al., 1995a; Sauders et al., 1995b                                                                                         |                                                                                                      |                                                                             |                                                                   |  |
| <b>MYCN</b><br>N-myc proto-oncogene protein                             | DMS (307)<br>DLS (702)<br>PFC(660)  | 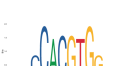 |                                                                                                                                                                                                                                                                               |                                                                                                                                                             |                                                                                                      |                                                                             |                                                                   |  |
| <b>NRF1</b><br>Nuclear Respiratory Factor 1                             | DLS (268)<br>VTA (588)<br>PFC (660) |                                                                                     |                                                                                                                                                                                                                                                                               |                                                                                                                                                             |                                                                                                      |                                                                             |                                                                   |  |
| <b>RUNX3</b><br>Runt-Related Transcription<br>Factor 3                  | Blood (174)                         | 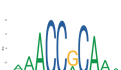 |                                                                                                                                                                                                                                                                               |                                                                                                                                                             |                                                                                                      |                                                                             |                                                                   |  |
| <b>SP1</b><br>Specificity Protein 1                                     | DMS (278)                           |                                                                                     | Shi et al., 2016M Chan et al., 2010; Wang et al., 2010; Waters et al., 2009; Boer et al., 2005; Perez-Castro et al., 1997; Bonello et al., 2004; Chen et al., 2017; Chang et al., 2014; Benjamin et al., 2010; Midgley et al., 2004; Cole et al., 1997; Bermudez et al., 2008 | Hedrick et al., 2016; Norkina et al., 2007; Hur et al., 1992; Edenberg et al., 1992; Do et al., 2013; Zhang et al., 2015;                                   | Furuta et al., 2008; Mudduluru et al., 2008; Liu et al., 2008; Yu et al., 2020; Norkina et al., 2007 |                                                                             |                                                                   |  |

| Transcription factor                                                         | Tissue<br>(CpG position)                              | Binding motif                                                                       | Publications (keywords entered in GeneCards) |                                  |                                                                                  |
|------------------------------------------------------------------------------|-------------------------------------------------------|-------------------------------------------------------------------------------------|----------------------------------------------|----------------------------------|----------------------------------------------------------------------------------|
|                                                                              |                                                       |                                                                                     | FGF2, FGFR1, growth factors                  | Alcohol, abuse, addiction, drugs | Methylation, epigenetic                                                          |
| <b>SP3</b><br>Specificity Protein 3                                          | PFC (700)                                             |                                                                                     |                                              | Gromnicova et al., 2012          |                                                                                  |
| <b>SPDEF</b><br>SAM Pointed Domain<br>Containing ETS Transcription<br>Factor | NAc (381)                                             | 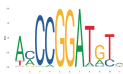   |                                              | Tay et al., 2019                 | Yin et al., 2017                                                                 |
| <b>TAF1</b><br>TATA-Box Binding Protein<br>Associated Factor 1               | DMS (307)<br>VTA (639; 643)<br>PFC (660)              |                                                                                     |                                              |                                  |                                                                                  |
| <b>TTY1</b><br>Transcriptional Repressor<br>Protein YY1                      | NAc (552)<br>DLS (552)<br>VTA (558; 609)              | 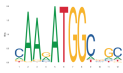   |                                              | Hur et al., 1992                 | Yin et al., 2017; Buira et al., 2010; Zhang et al., 2016; Mahadevan et al., 2014 |
| <b>YY2</b><br>Transcription Factor Yin Yang 2                                | NAc (552)<br>DLS (552)<br>VTA (558)                   | 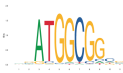   |                                              |                                  | Yin et al., 2017                                                                 |
| <b>ZBED1</b><br>Zinc Finger BED-Type<br>Containing 1                         | VTA (636)                                             | 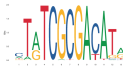   |                                              |                                  | Yin et al., 2017                                                                 |
| <b>ZBTB12</b><br>Zinc Finger And BTB Domain<br>Containing 12                 | VTA (609)                                             | 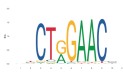   |                                              |                                  |                                                                                  |
| <b>ZBTB14</b><br>Zinc Finger And BTB Domain<br>Containing 14                 | DLS (269)<br>NAc (342; 381)<br>PFC (660)<br>VTA (669) | 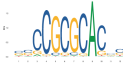 |                                              |                                  | Yin et al., 2017                                                                 |
| <b>ZBTB33</b><br>Zinc Finger And BTB Domain<br>Containing 33                 | VTA (636)<br>PFC (660)                                | 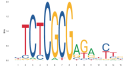 |                                              |                                  |                                                                                  |
| <b>Zic2</b><br>Zinc finger protein 2                                         | Blood (174)                                           | 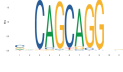 |                                              |                                  |                                                                                  |
| <b>ZNF317</b><br>Zinc finger protein 317                                     | Blood (174)                                           | 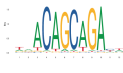 |                                              |                                  |                                                                                  |
| <b>ZNF341</b><br>Zinc Finger Protein 341                                     | VTA (669)                                             | 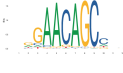 |                                              |                                  |                                                                                  |
| <b>ZNF460</b><br>Zinc Finger Protein 460                                     | VTA (558)                                             | 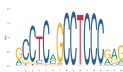 |                                              |                                  | Yin et al., 2017                                                                 |
