# Supplementary material for: Chronic Voluntary Alcohol Consumption Alters Promoter Methylation and Expression of Fgf-2 and Fgfr1
Source: Int J Mol Sci. 2023 Feb 7;24(4):3336. doi: 10.3390/ijms24043336 (PMC9963845; doi:10.3390/ijms24043336)
Supplement: Supplementary file 1 [file ijms-24-03336-s001.zip › Supplemental Excel File S2.pdf]

| Transcription factor                                     | Tissue<br>(CpG position) | Binding motif                                                                       | Publications (keywords entered in GeneCards)                                                                                                                                                                                                                                  |                                                                                                                           |                                                                                                      |                                                            |
|----------------------------------------------------------|--------------------------|-------------------------------------------------------------------------------------|-------------------------------------------------------------------------------------------------------------------------------------------------------------------------------------------------------------------------------------------------------------------------------|---------------------------------------------------------------------------------------------------------------------------|------------------------------------------------------------------------------------------------------|------------------------------------------------------------|
|                                                          |                          |                                                                                     | FGF2, FGFR1, growth factors                                                                                                                                                                                                                                                   | Alcohol, abuse, addiction, drugs                                                                                          | Methylation, epigenetic                                                                              | PFC, Nac, DLS, DMS, VTA, SNc, striatal, mesolimbic, reward |
| <b>NFE2</b><br>Nuclear Factor, Erythroid 2               | PFC (-270bp)             | 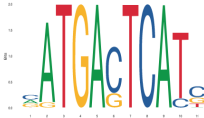   |                                                                                                                                                                                                                                                                               |                                                                                                                           | Yin et al., 2017;<br>Kiekhäfer et al., 2002                                                          |                                                            |
| <b>SP1</b><br>Transcription Factor/Specificity Protein 1 | DLS (-361)               | 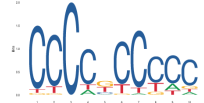   | Shi et al., 2016M Chan et al., 2010; Wang et al., 2010; Waters et al., 2009; Boer et al., 2005; Perez-Castro et al., 1997; Bonello et al., 2004; Chen et al., 2017; Chang et al., 2014; Benjamin et al., 2010; Midgley et al., 2004; Cole et al., 1997; Bermudez et al., 2008 | Hedrick et al., 2016; Norkina et al., 2007; Hur et al., 1992; Edenberg et al., 1992; Do et al., 2013; Zhang et al., 2015; | Furuta et al., 2008; Mudduluru et al., 2008; Liu et al., 2008; Yu et al., 2020; Norkina et al., 2007 |                                                            |
| <b>SP2</b><br>Transcription Factor/Specificity Protein 2 | DLS (-361)               | 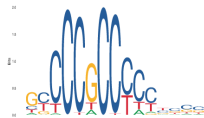   |                                                                                                                                                                                                                                                                               |                                                                                                                           | Yin et al., 2017                                                                                     |                                                            |
| <b>SP3</b><br>Transcription Factor/Specificity Protein 3 | DLS (-361)               | 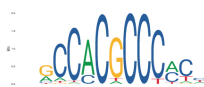   |                                                                                                                                                                                                                                                                               | Gromnicova et al., 2012                                                                                                   |                                                                                                      |                                                            |
| <b>ZNF460</b><br>Zinc Finger Protein 460                 | DLS (-361)               | 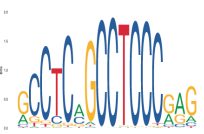  |                                                                                                                                                                                                                                                                               |                                                                                                                           | Yin et al., 2017                                                                                     |                                                            |
| <b>ZNF770</b><br>Zinc Finger Protein 770                 | DLS (-361)               | 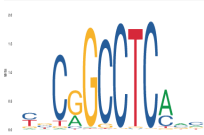 |                                                                                                                                                                                                                                                                               |                                                                                                                           |                                                                                                      |                                                            |
